# Supplementary material
Source: PubMed Central journal article supplement (PMC6990723)
Supplement: jamapediatr-174-e195183-s001.pdf [file jamapediatr-174-e195183-s001.pdf]

## Supplementary Online Content

Alinsky RH, Zima BT, Rodean J, et al. Receipt of addiction treatment after opioid overdose among Medicaid-enrolled adolescents and young adults. *JAMA Pediatr*. Published online January 6, 2020.  
doi:10.1001/jamapediatrics.2019.5183

**eTable 1.** *International Classification of Diseases, Ninth Revision, Clinical Modification (ICD-9-CM) Diagnosis Codes Used to Identify Clinical Covariates and Outcomes*

**eTable 2.** National Drug Codes Used to Identify Receipt of Pharmacotherapy

**eTable 3.** Healthcare Cost and Utilization Project (HCUP) Clinical Classifications Software (CCS) groups, *Current Procedural Terminology (CPT) codes*, and Healthcare Common Procedure Coding System (HCPCS) Codes Used to Identify Clinical Covariates and Outcomes

### eReferences

This supplementary material has been provided by the authors to give readers additional information about their work.

**eTable 1. International Classification of Diseases, Ninth Revision, Clinical Modification (ICD-9-CM) Diagnosis Codes Used to Identify Clinical Covariates and Outcomes**

| <b>ICD-9-CM diagnosis codes used to identify hospitalizations or emergency department visits attributed to opioid poisoning<sup>1-5</sup></b> |                                                                                                                                                                                                                                                                                                                                                                                                                                                                                                                                                                                                                                                                                                                                                                                                                                 |
|-----------------------------------------------------------------------------------------------------------------------------------------------|---------------------------------------------------------------------------------------------------------------------------------------------------------------------------------------------------------------------------------------------------------------------------------------------------------------------------------------------------------------------------------------------------------------------------------------------------------------------------------------------------------------------------------------------------------------------------------------------------------------------------------------------------------------------------------------------------------------------------------------------------------------------------------------------------------------------------------|
|                                                                                                                                               | E850.0 (accidental poisoning by heroin)<br>E850.1 (accidental poisoning by methadone)<br>E850.2 (accidental poisoning by another opioid)<br>965.00 (poisoning by opium)<br>965.01 (poisoning by heroin)<br>965.02 (poisoning by methadone)<br>965.09 (poisoning by other opiates)                                                                                                                                                                                                                                                                                                                                                                                                                                                                                                                                               |
| <b>ICD-9-CM diagnosis codes used to identify hospitalizations or emergency department visits attributed to self-harm<sup>5,6</sup></b>        |                                                                                                                                                                                                                                                                                                                                                                                                                                                                                                                                                                                                                                                                                                                                                                                                                                 |
|                                                                                                                                               | V62.84 (Suicidal ideation)<br>E950.0 (Suicide and self-inflicted poisoning by analgesics, antipyretics, and antirheumatics)<br>E950.1 (Suicide and self-inflicted poisoning by barbiturates)<br>E950.2 (Suicide and self-inflicted poisoning by other sedatives and hypnotics)<br>E950.3 (Suicide and self-inflicted poisoning by tranquilizers and other psychotropic agents)<br>E950.4 (Suicide and self-inflicted poisoning by other specified drugs and medicinal substances)<br>E950.5 (Suicide and self-inflicted poisoning by unspecified drug or medicinal substance)                                                                                                                                                                                                                                                   |
| <b>ICD-9-CM diagnosis codes used to identify medical and psychiatric comorbidity</b>                                                          |                                                                                                                                                                                                                                                                                                                                                                                                                                                                                                                                                                                                                                                                                                                                                                                                                                 |
| Depression <sup>7</sup>                                                                                                                       | 296.2-296.39, 311, 300.4, 296.9-296.99                                                                                                                                                                                                                                                                                                                                                                                                                                                                                                                                                                                                                                                                                                                                                                                          |
| Anxiety disorder <sup>7</sup>                                                                                                                 | 300-300.3, 300.5-300.9, 309.21, 309.81                                                                                                                                                                                                                                                                                                                                                                                                                                                                                                                                                                                                                                                                                                                                                                                          |
| ADHD <sup>7</sup>                                                                                                                             | 314-314.9                                                                                                                                                                                                                                                                                                                                                                                                                                                                                                                                                                                                                                                                                                                                                                                                                       |
| Acute pain condition <sup>5</sup>                                                                                                             | 282.62, 338.11, 338.12, 338.18, 338.19, 522.5, 522.7, 574, 577, 592, 733.1, 800, 801, 802, 803, 804, 805, 806, 807, 808, 809, 810, 811, 812, 813, 814, 815, 816, 817, 818, 819, 820, 821, 822, 823, 824, 825, 826, 827, 828, 829, 830, 831, 832, 833, 834, 835, 836, 837, 838, 839, 840, 841, 842, 843, 844, 845, 846, 847, 848, 850, 851, 852, 853, 854, 860, 861, 862, 863, 864, 865, 866, 867, 868, 869, 870, 871, 872, 873, 874, 875, 876, 877, 878, 879, 880, 881, 882, 883, 884, 885, 886, 887, 890, 891, 892, 893, 894, 895, 896, 897, 900, 901, 902, 903, 904, 910, 911, 912, 913, 914, 915, 916, 917, 918, 919, 920, 921, 922, 923, 924, 925, 926, 927, 928, 929, 930, 931, 932, 933, 934, 935, 936, 937, 938, 939, 940, 941, 942, 943, 944, 945, 946, 947, 948, 949, 950, 951, 952, 953, 954, 955, 956, 957, 958, 959 |
| Chronic pain condition <sup>5</sup>                                                                                                           | 338.21, 338.22, 338.28, 338.29, 338.4, 346.0, 346.1, 346.2, 346.3, 346.4, 346.5, 346.6, 346.7, 346.8, 346.9, 307.81, 710, 711, 712, 713, 714, 715, 716, 717, 718, 719, 720, 721, 722, 723, 724, 725, 726, 727, 728, 729                                                                                                                                                                                                                                                                                                                                                                                                                                                                                                                                                                                                         |
| Opioid use disorder <sup>8</sup>                                                                                                              | 304.0x, 304.7x                                                                                                                                                                                                                                                                                                                                                                                                                                                                                                                                                                                                                                                                                                                                                                                                                  |
| Alcohol use <sup>9</sup>                                                                                                                      | Alcohol withdrawal, intoxication, and abuse:<br>291.0, 291.3, 291.4, 291.81, 303.0, 305.0<br>Alcohol dependence:<br>291.1, 291.2, 291.5, 291.8, 291.82, 291.89, 291.9, 303.9                                                                                                                                                                                                                                                                                                                                                                                                                                                                                                                                                                                                                                                    |
| Other drug use <sup>9</sup>                                                                                                                   | Drug withdrawal, intoxication, and abuse:<br>292.0, 292.1, 292.2, 292.81, 305.2-305.7<br>Drug dependence:<br>292.82-292.89, 292.9, 304.1-304.6                                                                                                                                                                                                                                                                                                                                                                                                                                                                                                                                                                                                                                                                                  |

**eTable 2. National Drug Codes Used to Identify Receipt of Pharmacotherapy**

| <b>National Drug Codes (NDCs) used to identify receipt of pharmacotherapy.<sup>10</sup></b> |                                                                                                                                                                                                                                                                                                                                                                                                                                                                                                                                                                                                                                                                                                                                                                                                                                                                                                                                                                                                                                                                                                                                                                                                                                                                                                                                                                                                                                                                                                                                                                                                                                                                                                                                                                                                                                                                                                                                                                                                                                                                                                                                                              |
|---------------------------------------------------------------------------------------------|--------------------------------------------------------------------------------------------------------------------------------------------------------------------------------------------------------------------------------------------------------------------------------------------------------------------------------------------------------------------------------------------------------------------------------------------------------------------------------------------------------------------------------------------------------------------------------------------------------------------------------------------------------------------------------------------------------------------------------------------------------------------------------------------------------------------------------------------------------------------------------------------------------------------------------------------------------------------------------------------------------------------------------------------------------------------------------------------------------------------------------------------------------------------------------------------------------------------------------------------------------------------------------------------------------------------------------------------------------------------------------------------------------------------------------------------------------------------------------------------------------------------------------------------------------------------------------------------------------------------------------------------------------------------------------------------------------------------------------------------------------------------------------------------------------------------------------------------------------------------------------------------------------------------------------------------------------------------------------------------------------------------------------------------------------------------------------------------------------------------------------------------------------------|
| <b>Buprenorphine</b>                                                                        | 149075701, 12496075701, 12496075705, 54569141600, 54569141601, 54017613, 93537856, 228315603, 378092393, 12496127802, 35356055530, 49999063830, 50383092493, 68308020230, 54017713, 93537956, 228315303, 378092493, 12496131002, 35356055630, 49999063930, 50383093093, 63874117303, 68308020830, 74201201, 74201232, 409201232, 21695051510, 38779088800, 38779088801, 38779088803, 38779088806, 38779088809, 49452129201, 49452129202, 49452129203, 49452825301, 49452825302, 49452825303, 51552076501, 51552076502, 51552076505, 51552076506, 51552076509, 51552076510, 51552076550, 51927101200, 62991158301, 62991158302, 62991158303, 62991158304, 62991158306, 62991158307, 62991158308, 63275992201, 63275992202, 63275992203, 63275992204, 63275992205, 63275992207, 63370090506, 63370090509, 63370090510, 63370090515, 54018813, 93572056, 228315403, 228315473, 406192303, 12496128302, 16590066630, 42291017430, 49999039507, 49999039515, 49999039530, 50383029493, 52959074930, 54569549600, 54868575000, 55700018430, 63629402801, 63874108503, 65162041603, 68071151003, 68258299903, 54018913, 93572156, 228315503, 228315573, 406192403, 12496130602, 35356000407, 35356000430, 42291017530, 43063018407, 43063018430, 50383028793, 52959030430, 54569573900, 54569573901, 54569573902, 54569640800, 54868570700, 54868570701, 54868570702, 54868570703, 54868570704, 55045378403, 63629403401, 63629403402, 63629403403, 63874108403, 65162041503, 66336001630, 68071138003, 40042001001, 42023017901, 42023017905, 55390010010, 35356060704, 59011075004, 35356060504, 54569632500, 59011075104, 35356060604, 54569632600, 59011075204, 12496120201, 12496120203, 12496120801, 12496120803, 54569639900, 55700014730, 12496120401, 12496120403, 12496121201, 12496121203, 54123091430, 54123095730, 59011075804, 59385001201, 59385001230, 59385001401, 59385001430, 59385001601, 59385001630, 59011075704, 54123098630, 54123011430, 54123092930, 63481016101, 63481016160, 63481020701, 63481020760, 63481034801, 63481034860, 63481051901, 63481051960, 63481068501, 63481068560, 63481082001, 63481082060, 63481095201, 63481095260 |
| <b>Naltrexone</b>                                                                           | 56001122, 56001130, 56001170, 56007950, 56008050, 185003901, 185003930, 406009201, 406009203, 406117001, 406117003, 555090201, 555090202, 16729008101, 16729008110, 42291063230, 43063059115, 47335032683, 47335032688, 50436010501, 51224020630, 51224020650, 51285027501, 51285027502, 52152010502, 52152010504, 52152010530, 54868557400, 65694010003, 65694010010, 68084029111, 68084029121, 68094085362, 68115068030, 49452483501, 51927275300, 51927360200, 51927354800, 63459030042, 65757030001, 65757030202, 38779088703, 38779088704, 38779088705, 38779088706, 38779088708, 49452480801, 49452480802, 49452483502, 51552073701, 51552073702, 51552073704, 51927437700, 52372075101, 52372075102, 52372075103, 55812033301, 55812033302, 55812033303, 63370015810, 63370015815, 63370015825, 63370015835, 63370015845, 60966014404, 60966024403, 60966034402, 62991124301, 62991124302, 62991124303, 62991124304                                                                                                                                                                                                                                                                                                                                                                                                                                                                                                                                                                                                                                                                                                                                                                                                                                                                                                                                                                                                                                                                                                                                                                                                                                   |

**eTable 3.** Healthcare Cost and Utilization Project (HCUP) Clinical Classifications Software (CCS) groups, *Current Procedural Terminology (CPT)* codes, and Healthcare Common Procedure Coding System (HCPCS) Codes Used to Identify Clinical Covariates and Outcomes

| <b>HCUP CCS groups used to identify pregnancy<sup>11</sup></b>                                                                                            |                                                                                                                                                                                                                                                                                                                                                                                                                                             |
|-----------------------------------------------------------------------------------------------------------------------------------------------------------|---------------------------------------------------------------------------------------------------------------------------------------------------------------------------------------------------------------------------------------------------------------------------------------------------------------------------------------------------------------------------------------------------------------------------------------------|
|                                                                                                                                                           | Groups 177-196                                                                                                                                                                                                                                                                                                                                                                                                                              |
| <b>CPT and HCPCS codes used to identify behavioral health services utilization (i.e., mental health or substance use disorder treatment)<sup>12</sup></b> |                                                                                                                                                                                                                                                                                                                                                                                                                                             |
| Behavioral health services in any setting                                                                                                                 | 90791-90792, 90832-90834, 90836-90840, 90853, 90863, 90875-90876, G0396, G0397, H0001, H0002, H0004, H0005, H0006, H0007-H0011, H0012, H0013, H0014, H0015, H0016, H0017, H0018, H0019, H0022, H0031, H0032, H0035, H0036, H0037, H0038, H0039, H0040, H0046, H0047, H0050, H2000, H2001, H2010, H2011, H2012, H2013, H2014, H2015, H2016, H2017, H2018, H2019, H2020, H2034, H2035, H2036, S0201, S9480, S9484, S9485, T1006, T1007, T1012 |
| Among above codes, those indicating specific levels of service                                                                                            | H0008-H0014 (detoxification services)<br>H0015, S9480 (intensive outpatient care)<br>H0035, S0201 (partial hospital)<br>H0012, H0013, H0017-H0019 (residential care)<br>H0008-H0011 (inpatient care)                                                                                                                                                                                                                                        |
| <b>CPT codes used to identify health care utilization<sup>12</sup></b>                                                                                    |                                                                                                                                                                                                                                                                                                                                                                                                                                             |
| Outpatient medical care                                                                                                                                   | 99201-99205, 99211-99215, 99241-99245                                                                                                                                                                                                                                                                                                                                                                                                       |
| Emergency department care                                                                                                                                 | 99281-99285, 99288                                                                                                                                                                                                                                                                                                                                                                                                                          |
| Inpatient medical care                                                                                                                                    | 99221-99225, 99231-99235                                                                                                                                                                                                                                                                                                                                                                                                                    |
| <b>HCPCS codes used to identify medication utilization<sup>12</sup></b>                                                                                   |                                                                                                                                                                                                                                                                                                                                                                                                                                             |
| Methadone                                                                                                                                                 | H0020 (methadone administration and/or service (provision of the drug by a licensed program))                                                                                                                                                                                                                                                                                                                                               |
| Naltrexone                                                                                                                                                | J2315 (Injection, naltrexone, depot form)                                                                                                                                                                                                                                                                                                                                                                                                   |

## eReferences

1. Kane JM, Colvin JD, Bartlett AH, Hall M. Opioid-Related Critical Care Resource Use in US Children's Hospitals. *Pediatrics*. 2018;141(4):e20173335. doi:10.1542/peds.2017-3335
2. Stevens JP, Wall MJ, Novack L, Marshall J, Hsu DJ, Howell MD. The critical care crisis of opioid overdoses in the United States. *Ann Am Thorac Soc*. 2017;14(12):1803-1809. doi:10.1513/AnnalsATS.201701-022OC
3. Unick GJ, Rosenblum D, Mars S, Ciccarone D. Intertwined Epidemics: National Demographic Trends in Hospitalizations for Heroin- and Opioid-Related Overdoses, 1993-2009. *PLoS One*. 2013;8(2). doi:10.1371/journal.pone.0054496
4. Reardon JM, Harmon KJ, Schult GC, Staton CA, Waller AE. Use of diagnosis codes for detection of clinically significant opioid poisoning in the emergency department: A retrospective analysis of a surveillance case definition. *BMC Emerg Med*. 2016;16(1):1-6. doi:10.1186/s12873-016-0075-4
5. Centers for Disease Control and Prevention. Guide to ICD-9-CM and ICD-10 Codes Related to Poisoning and Pain. *CDC Website*. 2013. [https://www.cdc.gov/drugoverdose/pdf/pdo\\_guide\\_to\\_icd-9-cm\\_and\\_icd-10\\_codes-a.pdf](https://www.cdc.gov/drugoverdose/pdf/pdo_guide_to_icd-9-cm_and_icd-10_codes-a.pdf).
6. Naeger S, Mutter R, Ali MM, Mark T, Hughey L. Post-discharge treatment engagement among patients with an opioid-use disorder. *J Subst Abuse Treat*. 2016;69:64-71. doi:10.1016/j.jsat.2016.07.004
7. Bardach NS, Coker TR, Zima BT, et al. Common and Costly Hospitalizations for Pediatric Mental Health Disorders. *Pediatrics*. 2014;133(4):602-609. doi:10.1542/peds.2013-3165
8. Hadland SE, Frank Wharam JW, Schuster MA, Zhang F, Samet JH, Larochelle MR. Trends in receipt of buprenorphine and naltrexone for opioid use disorder among adolescents and young adults, 2001-2014. *JAMA Pediatr*. 2017;171(8):747-755. doi:10.1001/jamapediatrics.2017.0745
9. Pletcher MJ, Kertesz SG, Kohn MA, Gonzales R. Trends in Opioid Prescribing by Race / Ethnicity for Patients Seeking Care in US Emergency. *Jama*. 2008;299(1):70-78. doi:10.1001/jama.2007.64.PDF
10. Hadland SE, Bagley SM, Rodean J, et al. Receipt of Timely Addiction Treatment and Association of Early Medication Treatment With Retention in Care Among Youths With Opioid Use Disorder. *JAMA Pediatr*. 2018;172(11):1029-1037. doi:10.1001/jamapediatrics.2018.2143
11. Elixhauser A, Steiner C, Palmer L. CLINICAL CLASSIFICATIONS SOFTWARE ( CCS ) 2015. *US Agency Healthc Res Qual*. 2015. <https://www.hcup-us.ahrq.gov/toolssoftware/ccs/CCSUsersGuide.pdf>.
12. Harris AHS, Ellerbe L, Phelps TE, et al. Examining the specification validity of the HEDIS quality measures for substance use disorders. *J Subst Abuse Treat*. 2015;53:16-21. doi:10.1016/j.jsat.2015.01.002
